# Supplementary material for: Intravenous lidocaine to prevent endothelial dysfunction after major abdominal surgery: a randomized controlled pilot trial
Source: Springer Nature journal article supplement (doi:10.1186/s12871-020-01075-x), 2020-06-23

US: mode B + PW

US transducer

NIRS sensor

FMD analysis software

NIRS

blood pressure cuff

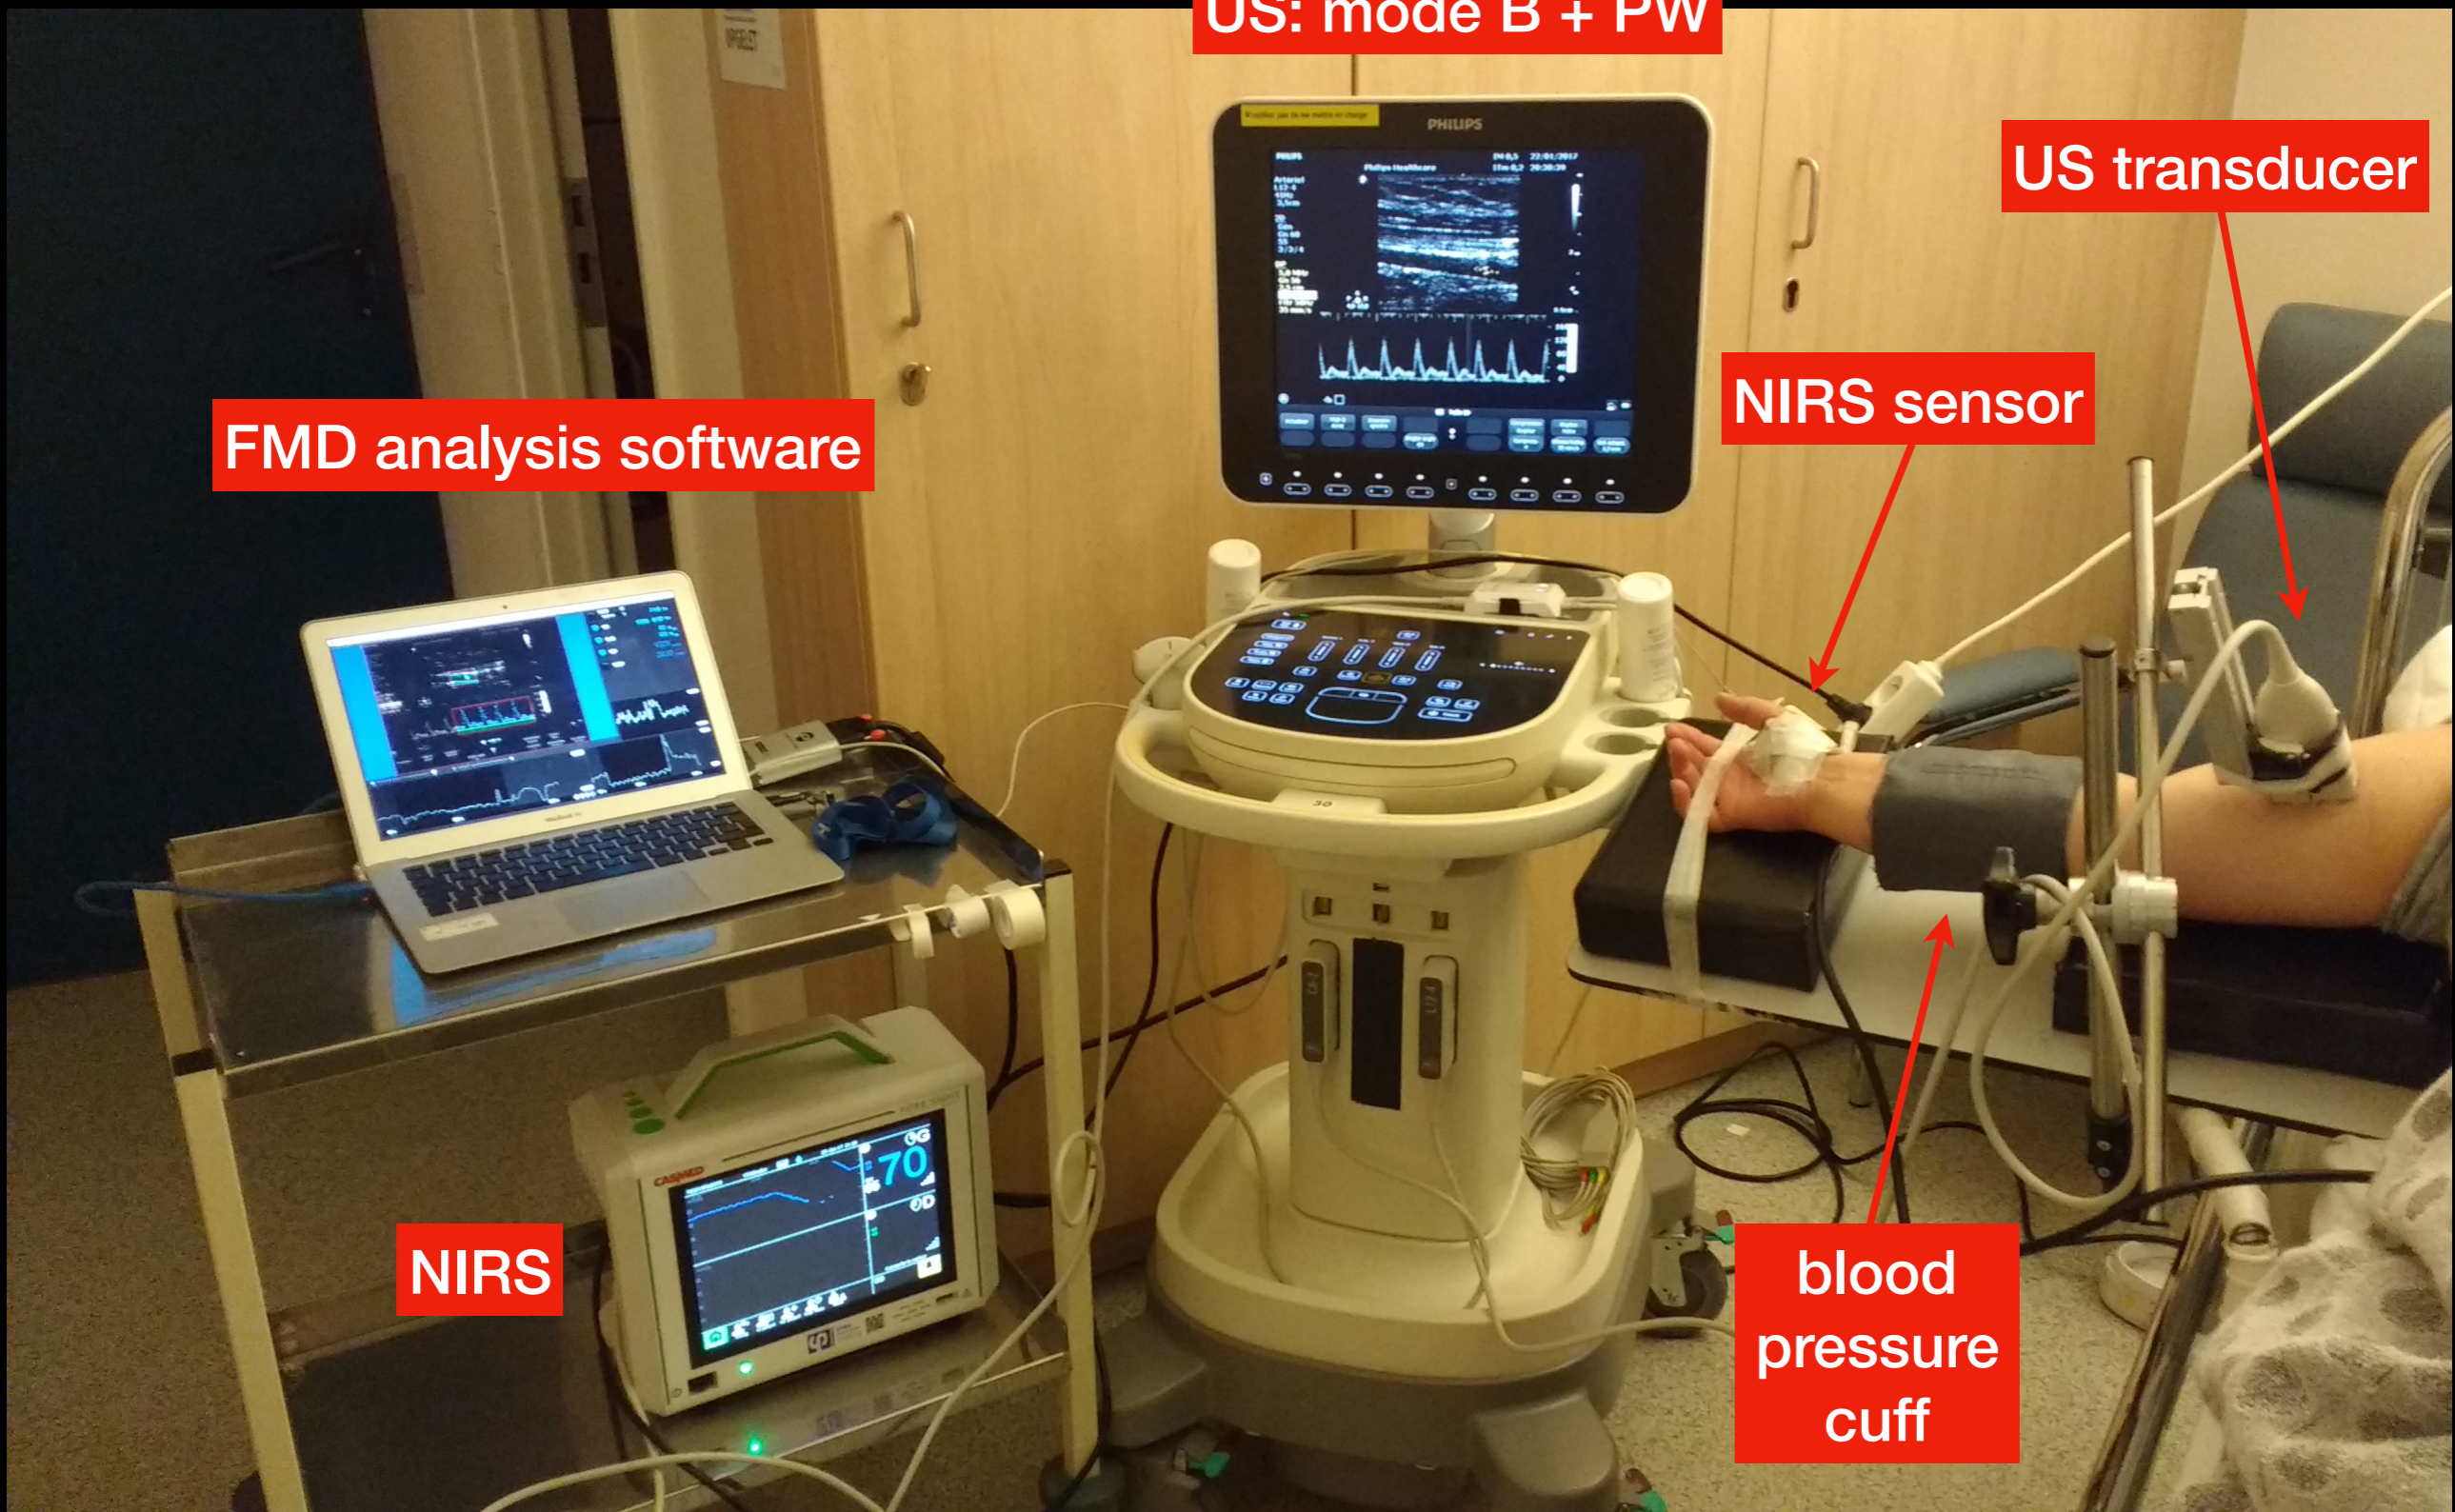

Supplement: MOESM1 [file 18112314]
