# Supplementary material for: Intravenous lidocaine to prevent endothelial dysfunction after major abdominal surgery: a randomized controlled pilot trial
Source: Springer Nature journal article supplement (doi:10.1186/s12871-020-01075-x), 2020-06-23
Supplement: MOESM2 [file 18112314]

# NIRS - Patient 6/40

StO<sub>2</sub>  
Baseline (%)

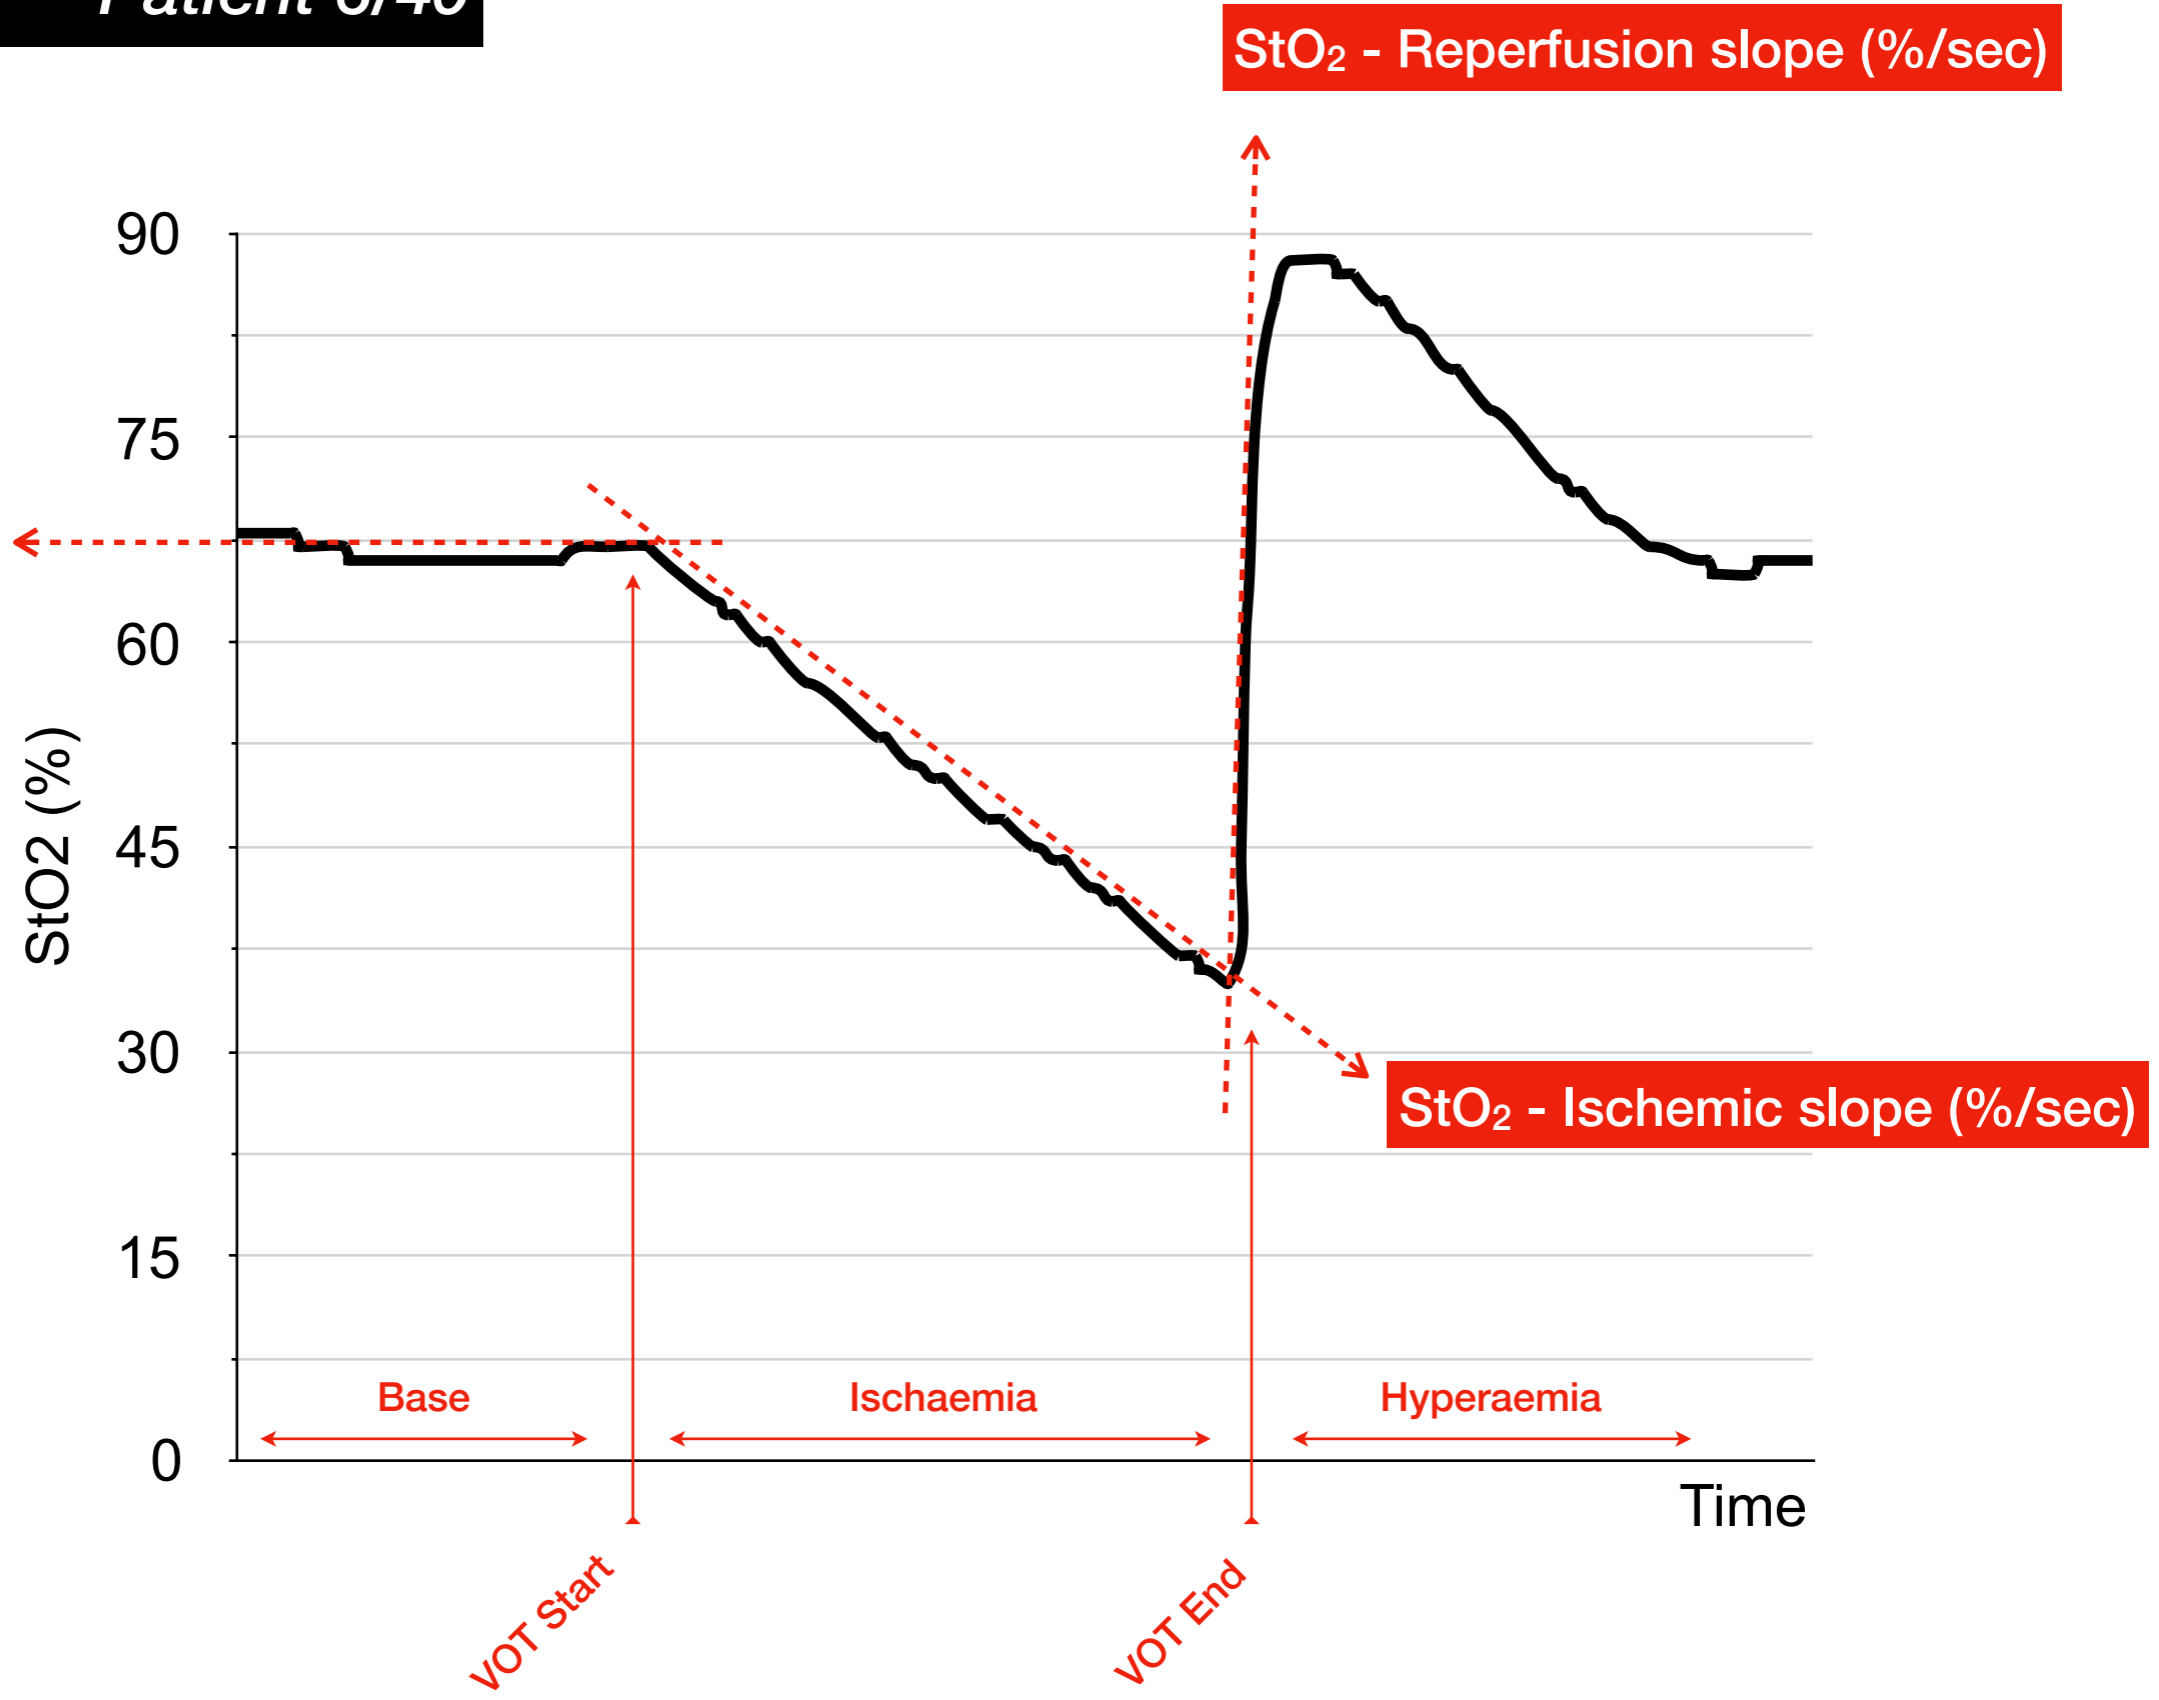

StO<sub>2</sub> - Reperfusion slope (%/sec)

StO<sub>2</sub> - Ischemic slope (%/sec)

Base Ischaemia Hyperaemia

VOT Start VOT End

Time
