# Supplementary material for: Intravenous lidocaine to prevent endothelial dysfunction after major abdominal surgery: a randomized controlled pilot trial
Source: Springer Nature journal article supplement (doi:10.1186/s12871-020-01075-x), 2020-06-23

# Diameter

Patient 6/40

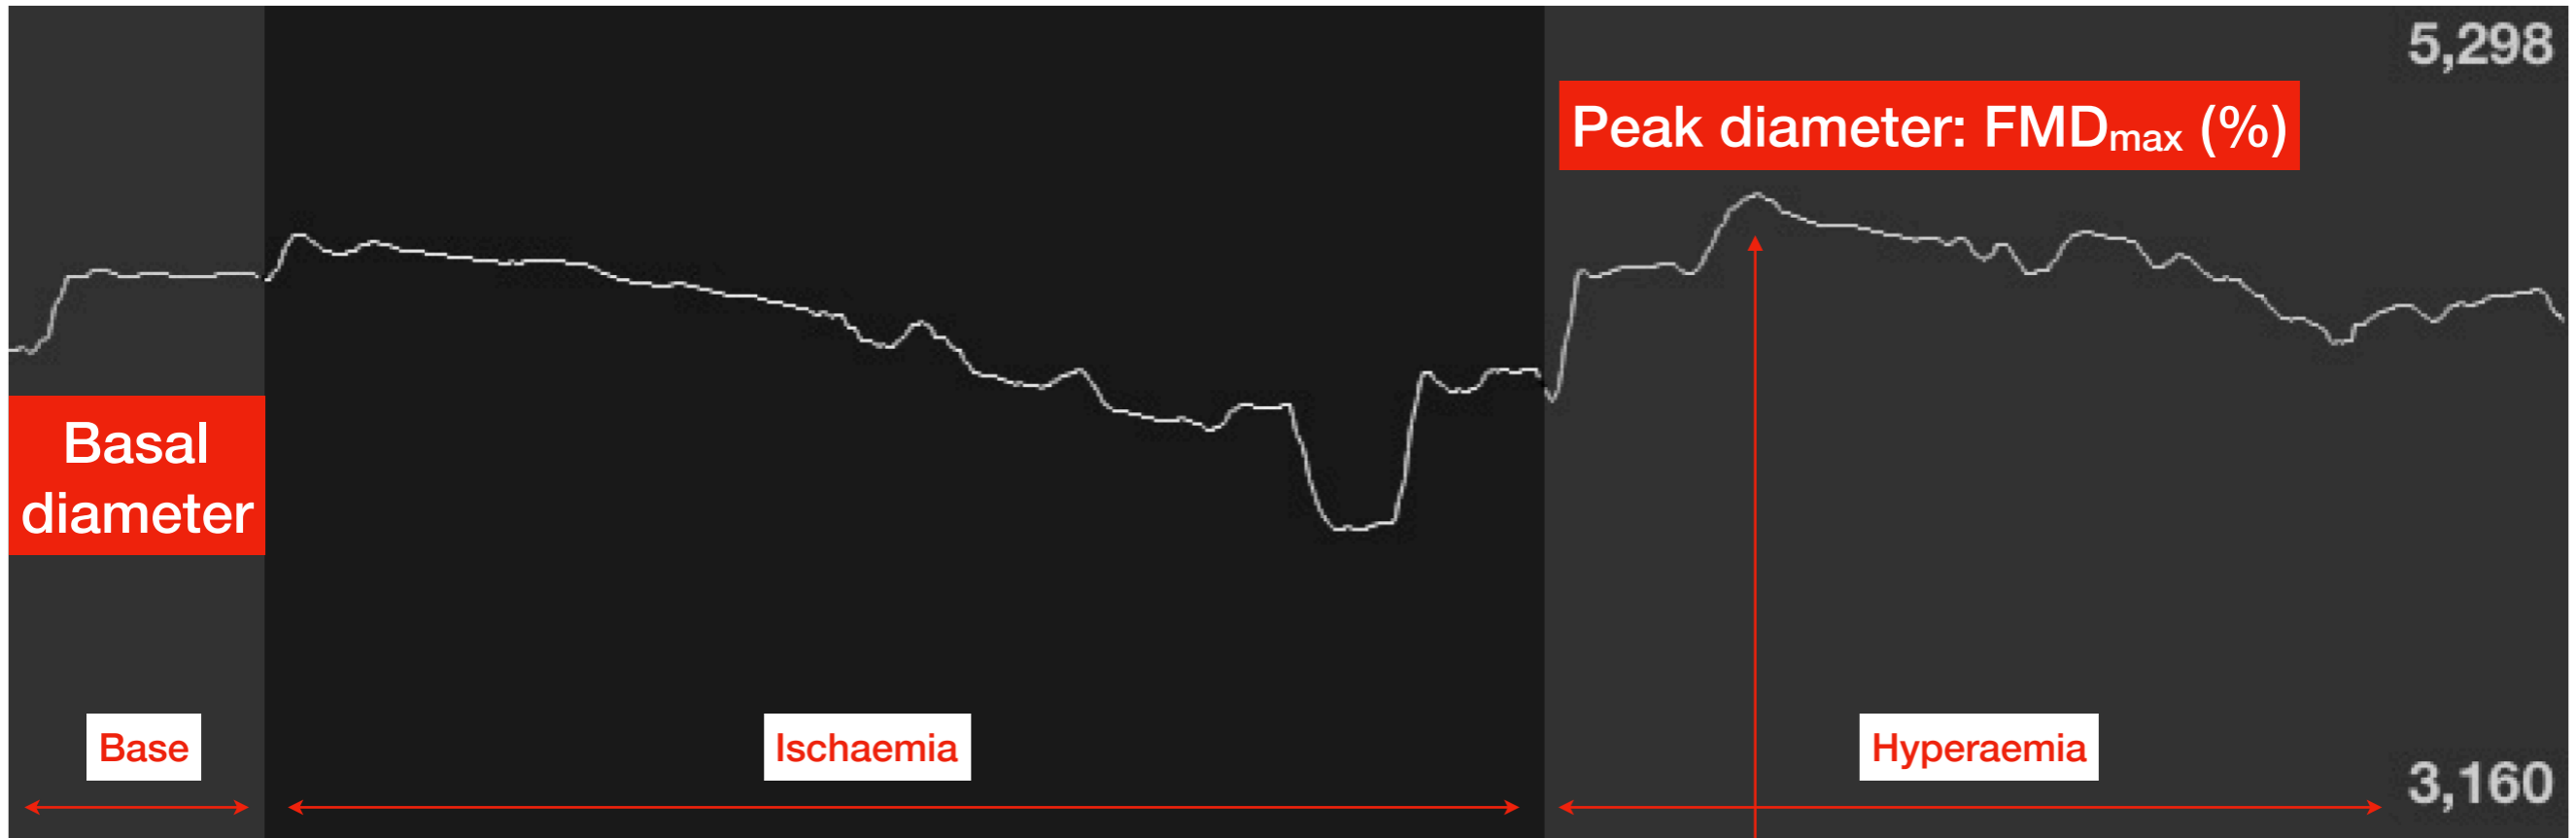

# Shear Rate

Patient 6/40

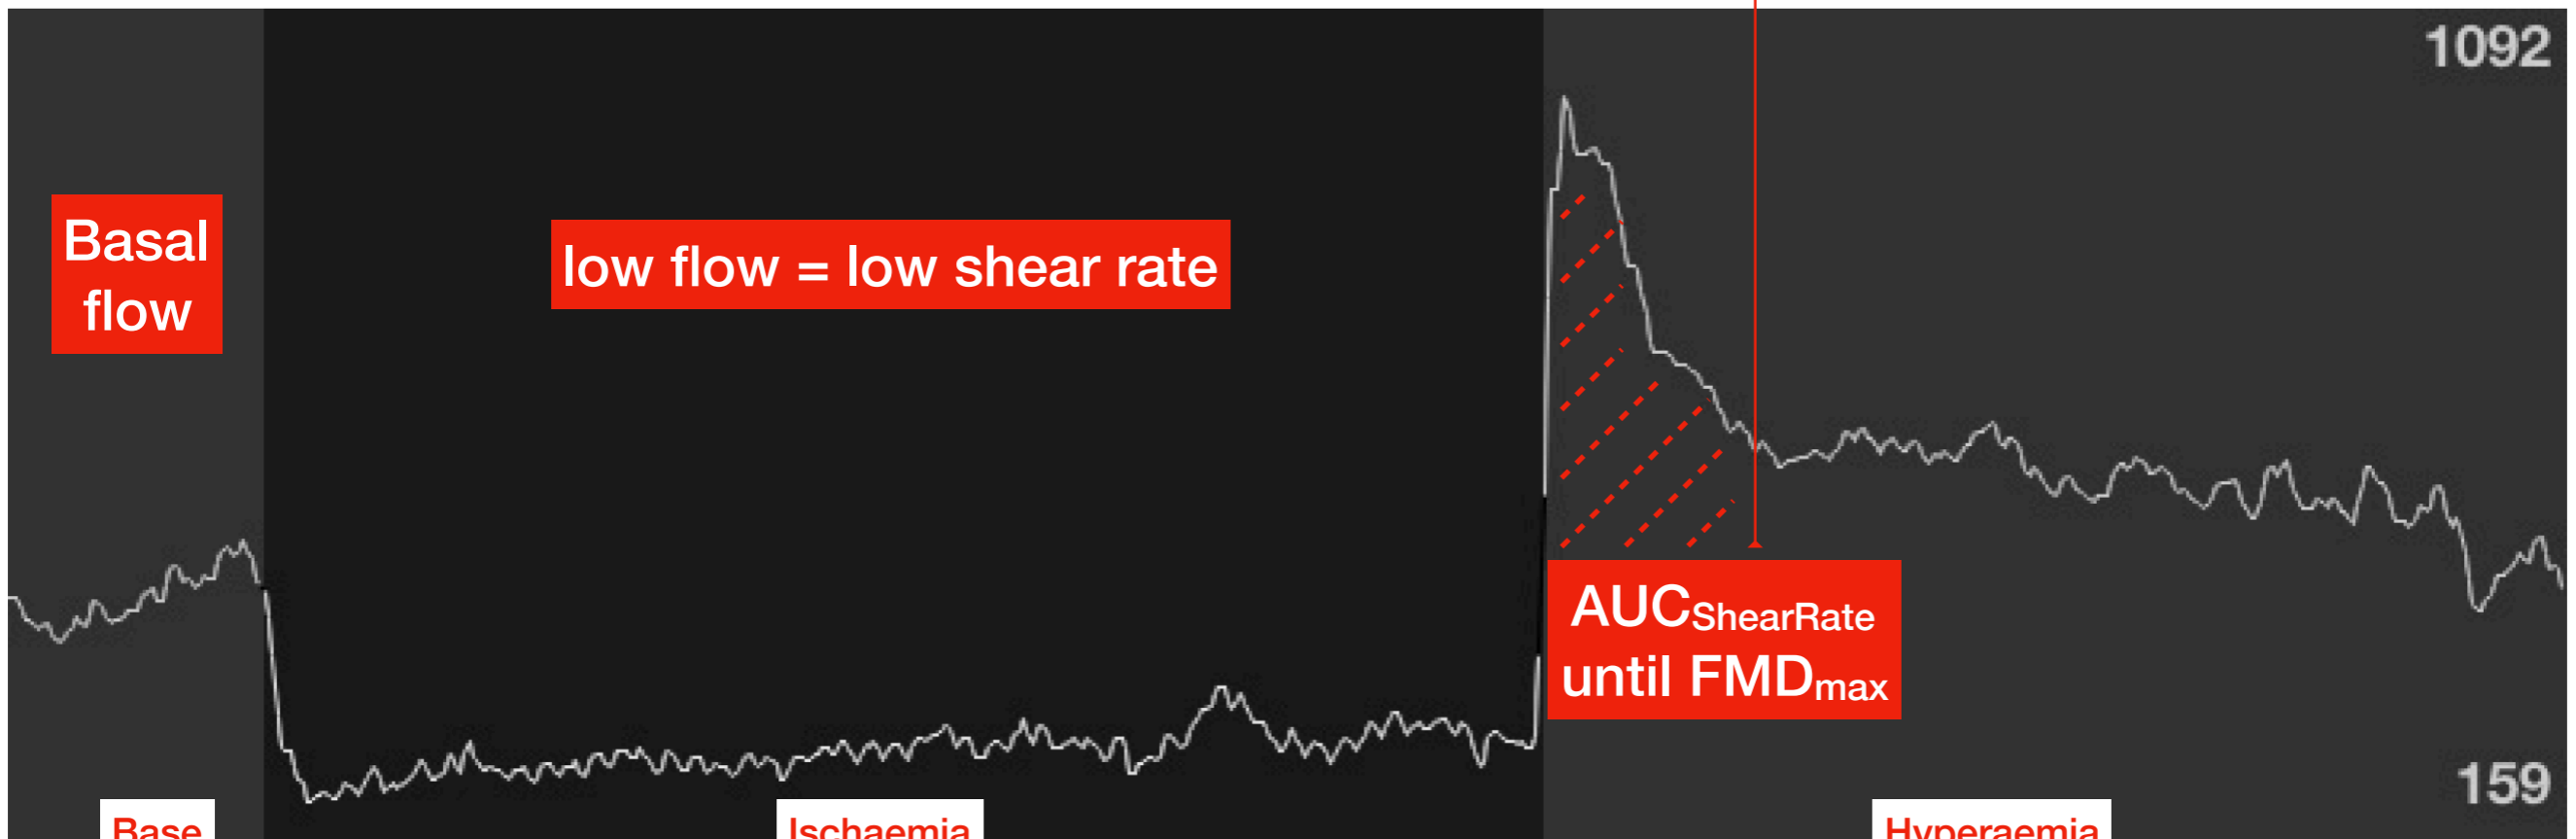

Supplement: MOESM3 [file 18112314]
